# Supplementary material
Source: PubMed Central journal article supplement (PMC5296338)

## SUPPLEMENTAL FIGURE LEGENDS

**Figure S1.** Verification of shRNA knockdown of the TAM receptors in prostate cancer cells. **A**, Protein level of each TAM receptor is shown by western blotting lysates of PC3, Du145 and C4-2B cells infected with lentivirus containing a control shRNA or a shRNA targeting each of the TAM receptors and grown in 10% serum. Du145 cells are shown with or without treatment with 1  $\mu$ g/ml rhGAS6. **B**, Quantification of MERTK expression by qRT-PCR of Du145, PC3 and C4-2B cells infected with lentivirus containing control or MERTK shRNA.

**Figure S2.** Further evaluation of p38 inhibitor treated prostate cancer cells. **A**, Control or MerTK shRNA knockdown PC3 cells grown for 2 weeks in media containing 0.05% DMSO or 5  $\mu$ M SB203580 with 10% serum. Phosphorylated p38, total p38 and  $\beta$ -actin were detected by western blot. **B**, Lysates of above cells were collected after overnight serum starvation and blotted for p27 and  $\beta$ -actin. **C**, Representative flow cytometry histograms for Ki67 labeling of above cells grown for 3 additional days in 0.1% serum. The Ki67 negative population is selected and quantified in red.

# Figure S1

**A**

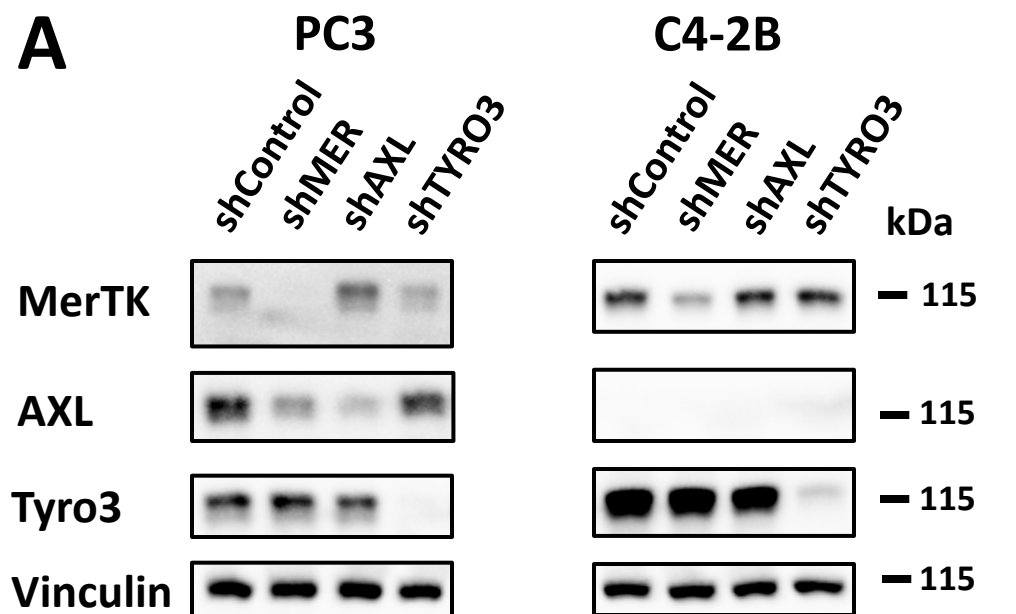

**Du145**

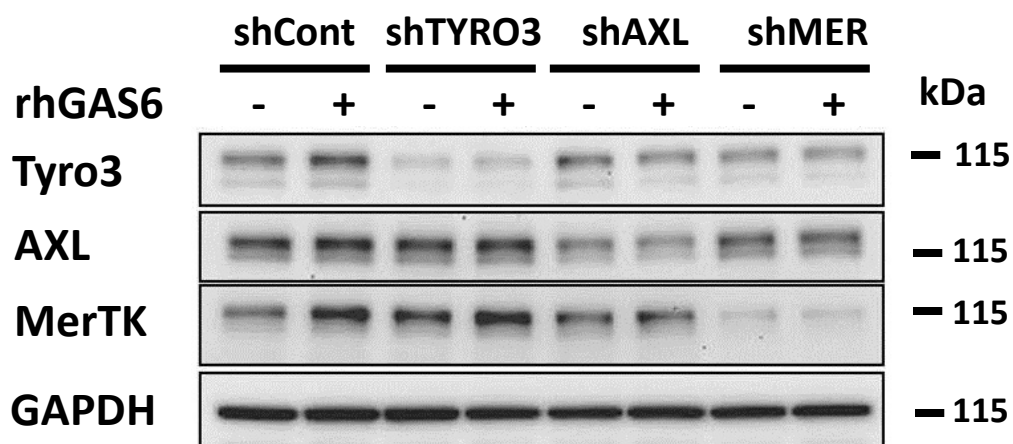

**B**

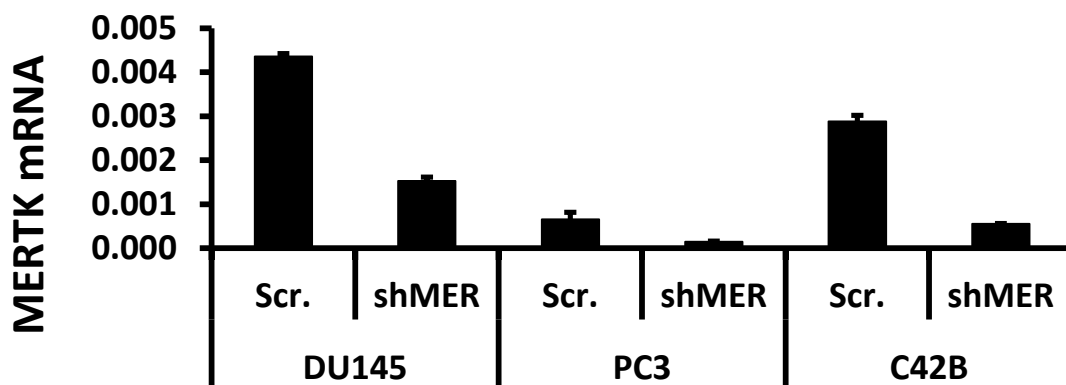

# Figure S2

**A**

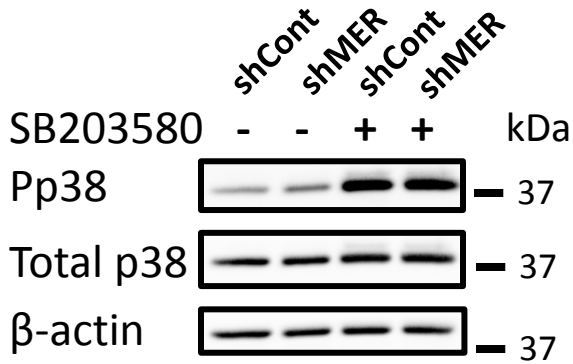

**B**

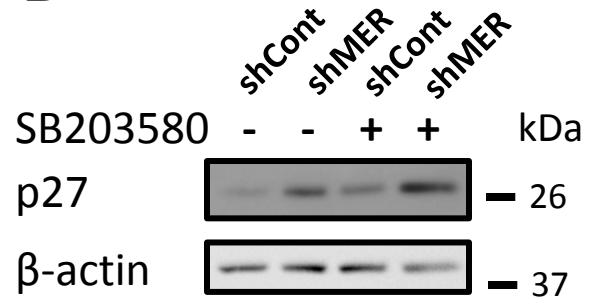

**C**

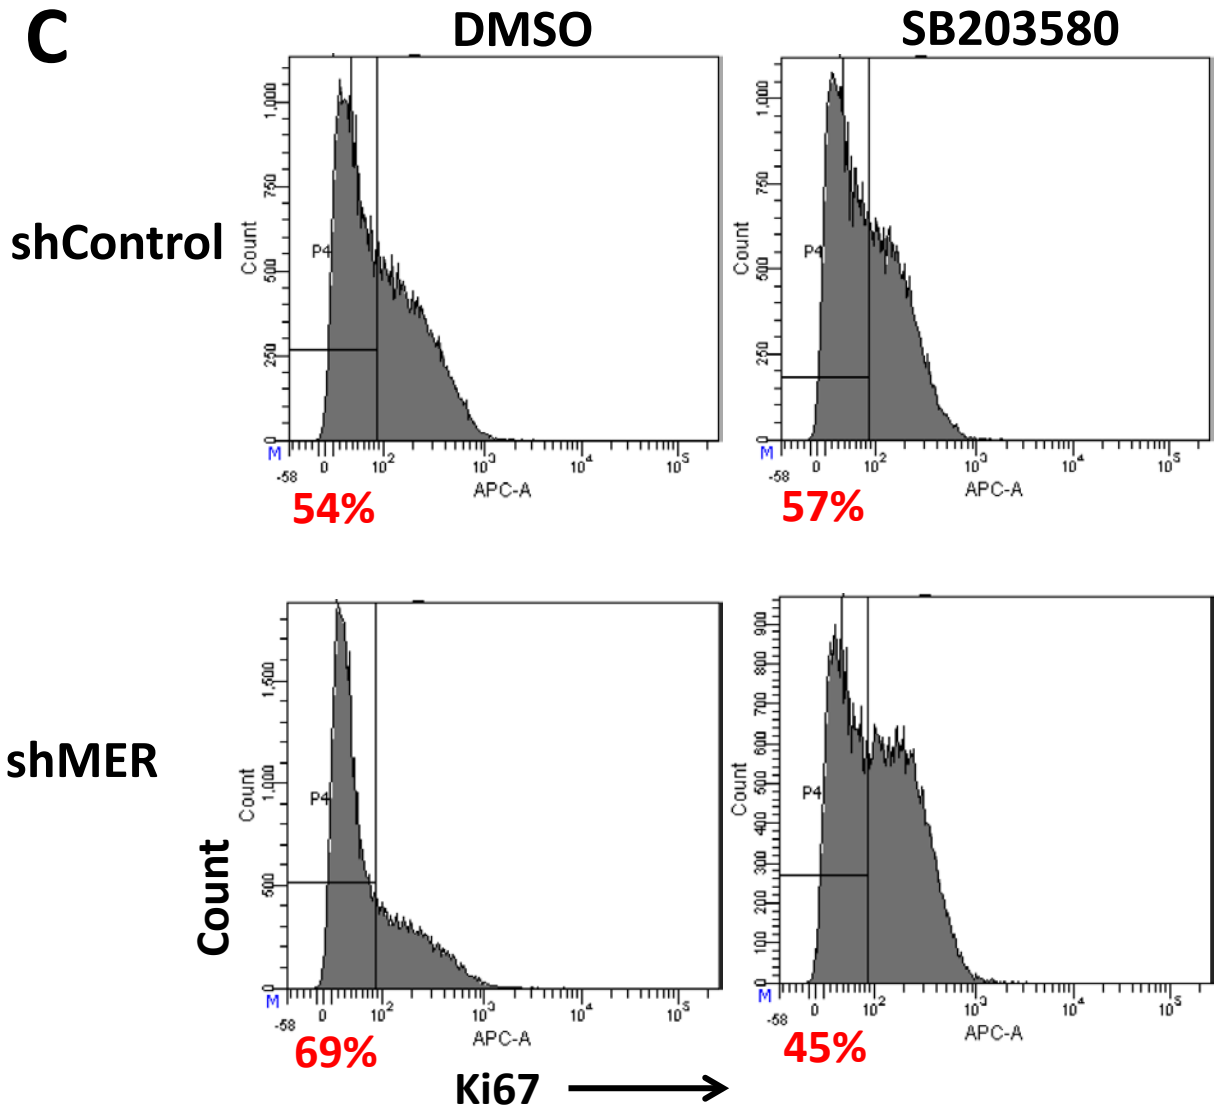

Supplement: NIHMS839834-supplement-01.pdf [file NIHMS839834-supplement-01.pdf]
